# Supplementary material for: Computational investigation of conformational variability and allostery in cathepsin K and other related peptidases
Source: PubMed Central journal article supplement (PMC5542433; doi:10.1371/journal.pone.0182387), 2017-08-03
Supplement: pone.0182387.s002.pdf [file pone.0182387.s002.pdf]

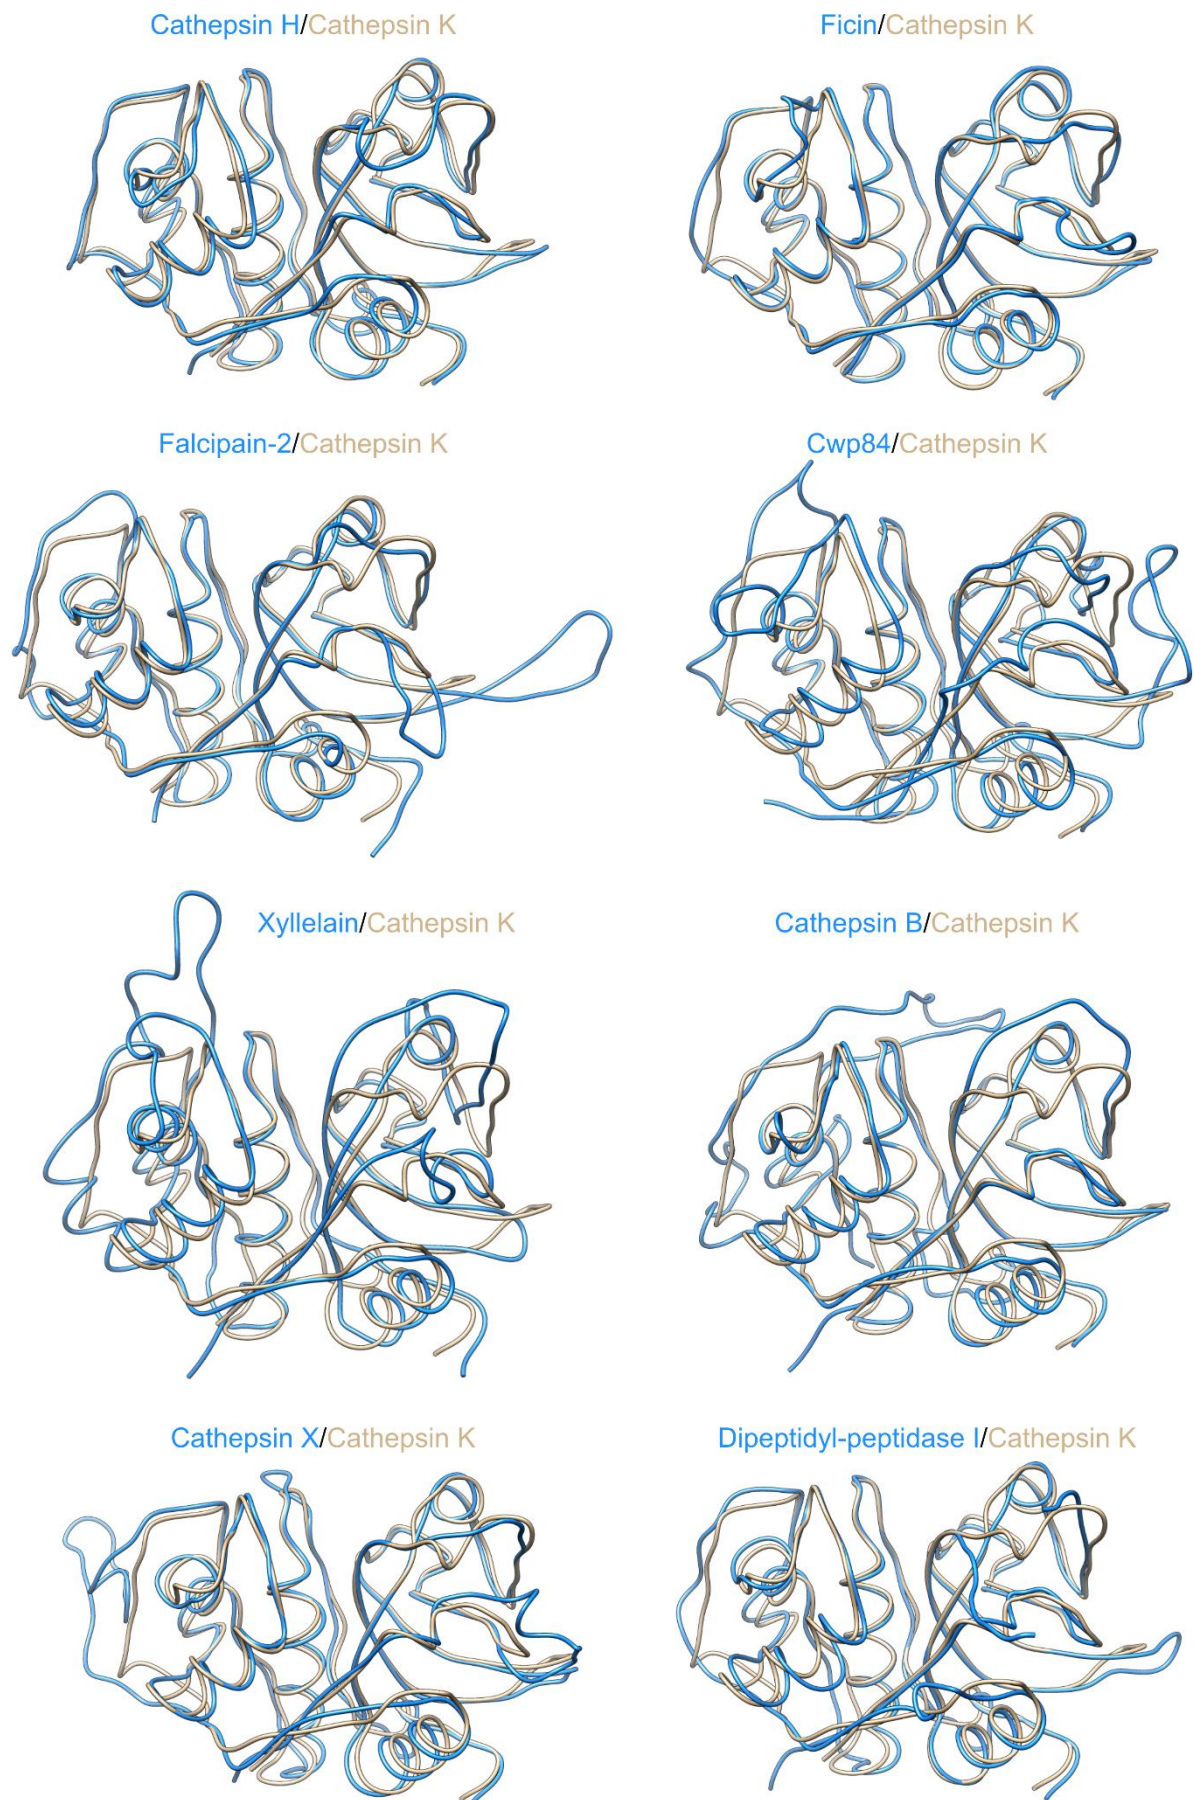

**S2 Fig. Pairwise superpositions of human cathepsin K (tan) and other representative papain-like peptidases (blue).** The superpositions were constructed from the PDB entries shown individually in Supplementary Figure S1. The graphics were prepared with UCSF Chimera Software.
