# Supplementary material for: Computational investigation of conformational variability and allostery in cathepsin K and other related peptidases
Source: PubMed Central journal article supplement (PMC5542433; doi:10.1371/journal.pone.0182387), 2017-08-03
Supplement: pone.0182387.s003.pdf [file pone.0182387.s003.pdf]

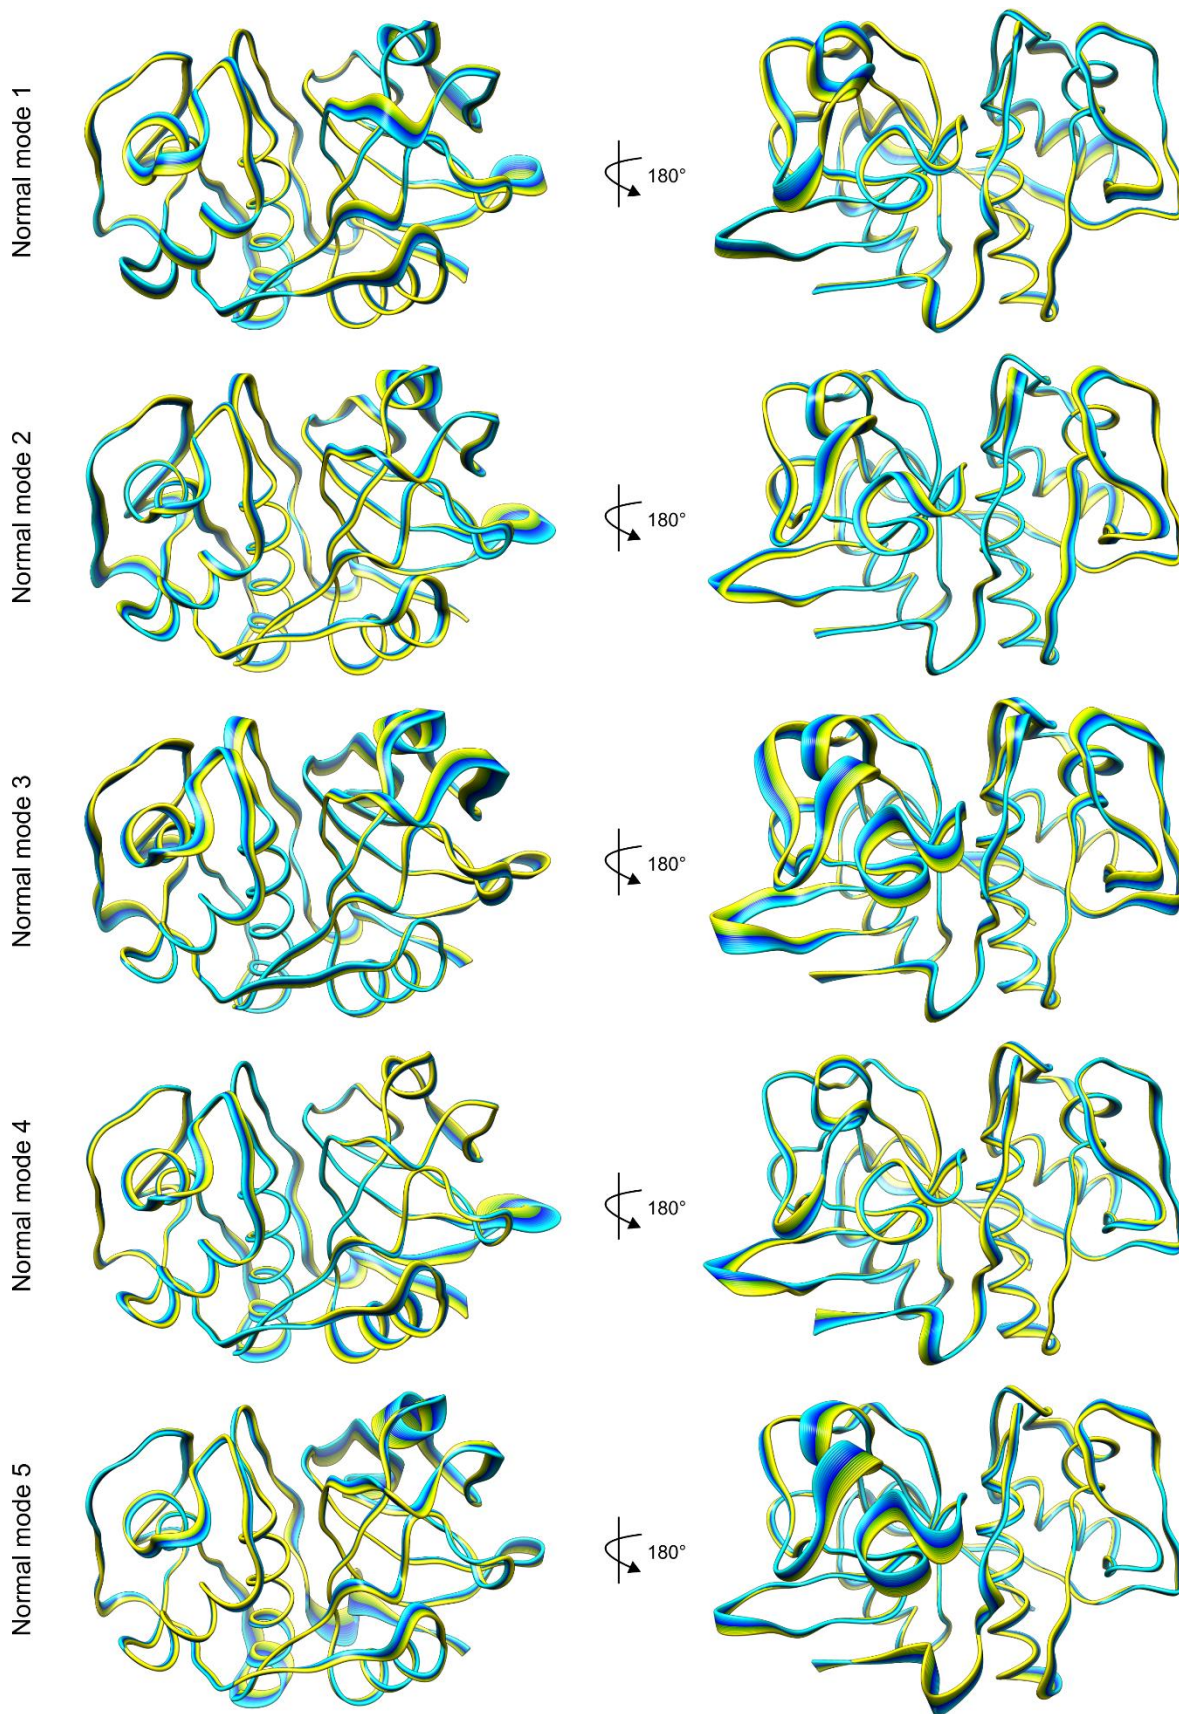

**S3 Fig. Normal mode analysis of cathepsin K.** Normal modes 1 through 5 (from top to bottom) calculated for an ensemble of 55 non-redundant cathepsin K structures. The representation contains only non-gapped positions in the sequence alignment (residues 3 through 215). The analysis was performed with the Bio3d package and the graphics prepared with UCSF Chimera Software.
