# Supplementary material for: Computational investigation of conformational variability and allostery in cathepsin K and other related peptidases
Source: PubMed Central journal article supplement (PMC5542433; doi:10.1371/journal.pone.0182387), 2017-08-03
Supplement: pone.0182387.s004.pdf [file pone.0182387.s004.pdf]

**S1 Table. Protein Data Bank accession codes of entries used in this work.**

|                    |                    |                       |                       |                    |                 |
|--------------------|--------------------|-----------------------|-----------------------|--------------------|-----------------|
| <b>Cathepsin K</b> | <b>Cathepsin L</b> | 3IEJ                  | 2DCC                  | 1KHQ               | 1EWP            |
| 1ATK               | 1CJL               | 3KWN                  | 2DCB                  | 1KHP               | 1AIM            |
| 1AU0               | 1CS8               | 3MPF                  | 2DCA                  | 2CIO               | 2AIM            |
| 1AU2               | 1ICF               | 3MPE                  | 2DC9                  | 3E1Z               | 1YVB            |
| 1AU3               | 1MHW               | 3N3G                  | 2DC8                  | 3U8E               | 2GHU            |
| 1AU4               | 2NQD               | 3OVZ                  | 2DC7                  | 2PRE               | 3PNR            |
| 1AYU               | 2XU1               | 3OVX                  | 2DC6                  | 3BCN               | 3BWK            |
| 1AYV               | 2XU3               | 3N4C                  | 2IPP                  | 2PNS               | 3BPF            |
| 1AYW               | 2XU4               | 4BSQ                  | 3CBJ                  | 2BDZ               | 3BPM            |
| 1BGO               | 2XU5               | 4BS5                  | 3CBK                  | 1CQD               | 2OUL            |
| 1BY8               | 2YJB               | 4BPV                  | 3K9M                  | 1MEG               |                 |
| 1MEM               | 2YJC               | 4BS6                  | 3AI8                  | 3IQQ               | <b>Bacteria</b> |
| 1NL6               | 2YJ2               | 4BQV                  | 4HWY                  | 1YAL               | 3OIS            |
| 1NLJ               | 2YJ8               | 4MZO                  | 4N4Z                  | 4YYQ               | 4D59            |
| 1Q6K               | 2YJ9               | 4MZS                  | 5FPW                  | 4YYR               | 4D5A            |
| 1SNK               | 3BC3               | 4P6E                  |                       | 4YYS               | 4CI7            |
| 1TU6               | 3HHA               | 4P6G                  | <b>Cathepsin X</b>    | 4YYU               |                 |
| 1U9V               | 3HWN               |                       | 1DEU                  | 4YYV               |                 |
| 1U9W               | 3H8B               | <b>Cathepsin V</b>    | 1EF7                  | 4YYW               |                 |
| 1U9X               | 3H8C               | 1FH0                  |                       | 1GEC               |                 |
| 1VSN               | 3H89               | 3H6S                  | <b>Cathepsin C</b>    | 3P5U               |                 |
| 1YK7               | 3K24               | 3KFQ                  | 1JQP                  | 3P5V               |                 |
| 1YK8               | 3IV2               |                       | 1K3B                  | 3P5W               |                 |
| 1YT7               | 3KSE               | <b>Cathepsin L</b>    | 2DJF                  | 3P5X               |                 |
| 2ATO               | 3OF8               | <b>non-vertebrate</b> | 2DJG                  | 1AEC               |                 |
| 2AUX               | 3OF9               | 2O6X                  | 3PDF                  | 2ACT               |                 |
| 2AUZ               | 4AXL               | 3F75                  | 4CDC                  |                    |                 |
| 2BDL               | 4AXM               | 3QJ3                  | 4CDD                  | <b>Unicellular</b> |                 |
| 2F7D               | 5F02               | 3QT4                  | 4CDE                  | <b>eukaryotes</b>  |                 |
| 2FTD               |                    |                       | 4CDF                  | 2P86               |                 |
| 2R6N               | <b>Cathepsin S</b> | <b>Cathepsin F</b>    | 4OEL                  | 2P7U               |                 |
| 3C9E               | 1GLO               | 1M6D                  | 4OEM                  | 3IUT               |                 |
| 3H7D               | 1NQC               |                       |                       | 1EWL               |                 |
| 3KW9               | 1NPZ               | <b>Cathepsin H</b>    | <b>Plant</b>          | 4QH6               |                 |
| 3KWB               | 1MS6               | 1NB3                  | <b>Endopeptidases</b> | 4W5C               |                 |
| 3KWZ               | 2FQ9               | 1NB5                  | 1PPD                  | 4XUI               |                 |
| 3KX1               | 2G6D               | 8PCH                  | 9PAP                  | 4W5B               |                 |
| 3O0U               | 2F1G               |                       | 1PE6                  | 4PI3               |                 |
| 3O1G               | 2FT2               | <b>Cathepsin B</b>    | 1POP                  | 4KLB               |                 |
| 3OVZ               | 2FRQ               | 1HUC                  | 1PIP                  | 3LXS               |                 |
| 4DMX               | 2FRA               | 1CTE                  | 1STF                  | 3KKU               |                 |
| 4DMY               | 2FUD               | 1CPJ                  | 1PPP                  | 3I06               |                 |
| 4N8W               | 2FYE               | 1THE                  | 1PPN                  | 3HD3               |                 |
| 4N79               | 2HH5               | 1CSB                  | 3IMA                  | 2OZ2               |                 |
| 4X6H               | 2G7Y               | 1MIR                  | 3TNX                  | 1U9Q               |                 |
| 4X6I               | 2HXZ               | 1PBH                  | 3USV                  | 1EWM               |                 |
| 4X6J               | 2H7J               | 2PBH                  | 4KP9                  | 1EWO               |                 |
| 5J94               | 2C0Y               | 3PBHJ                 | 4QRX                  | 1ME3               |                 |
| 5JA7               | 2HHN               | 1QDQ                  | 4QRG                  | 1ME4               |                 |
| 5JH3               | 2OP3               | 1GMY                  | 4QRV                  | 1F29               |                 |
| 7PCK               | 2R9M               | 1ITO                  | 1BP4                  | 1F2A               |                 |
|                    | 2R9N               | 1SP4                  | 1BQI                  | 1F2B               |                 |
|                    | 2R9O               | 2DCD                  | 1CVZ                  | 1F2C               |                 |
